# Supplementary material
Source: PubMed Central journal article supplement (PMC5873232)

**A**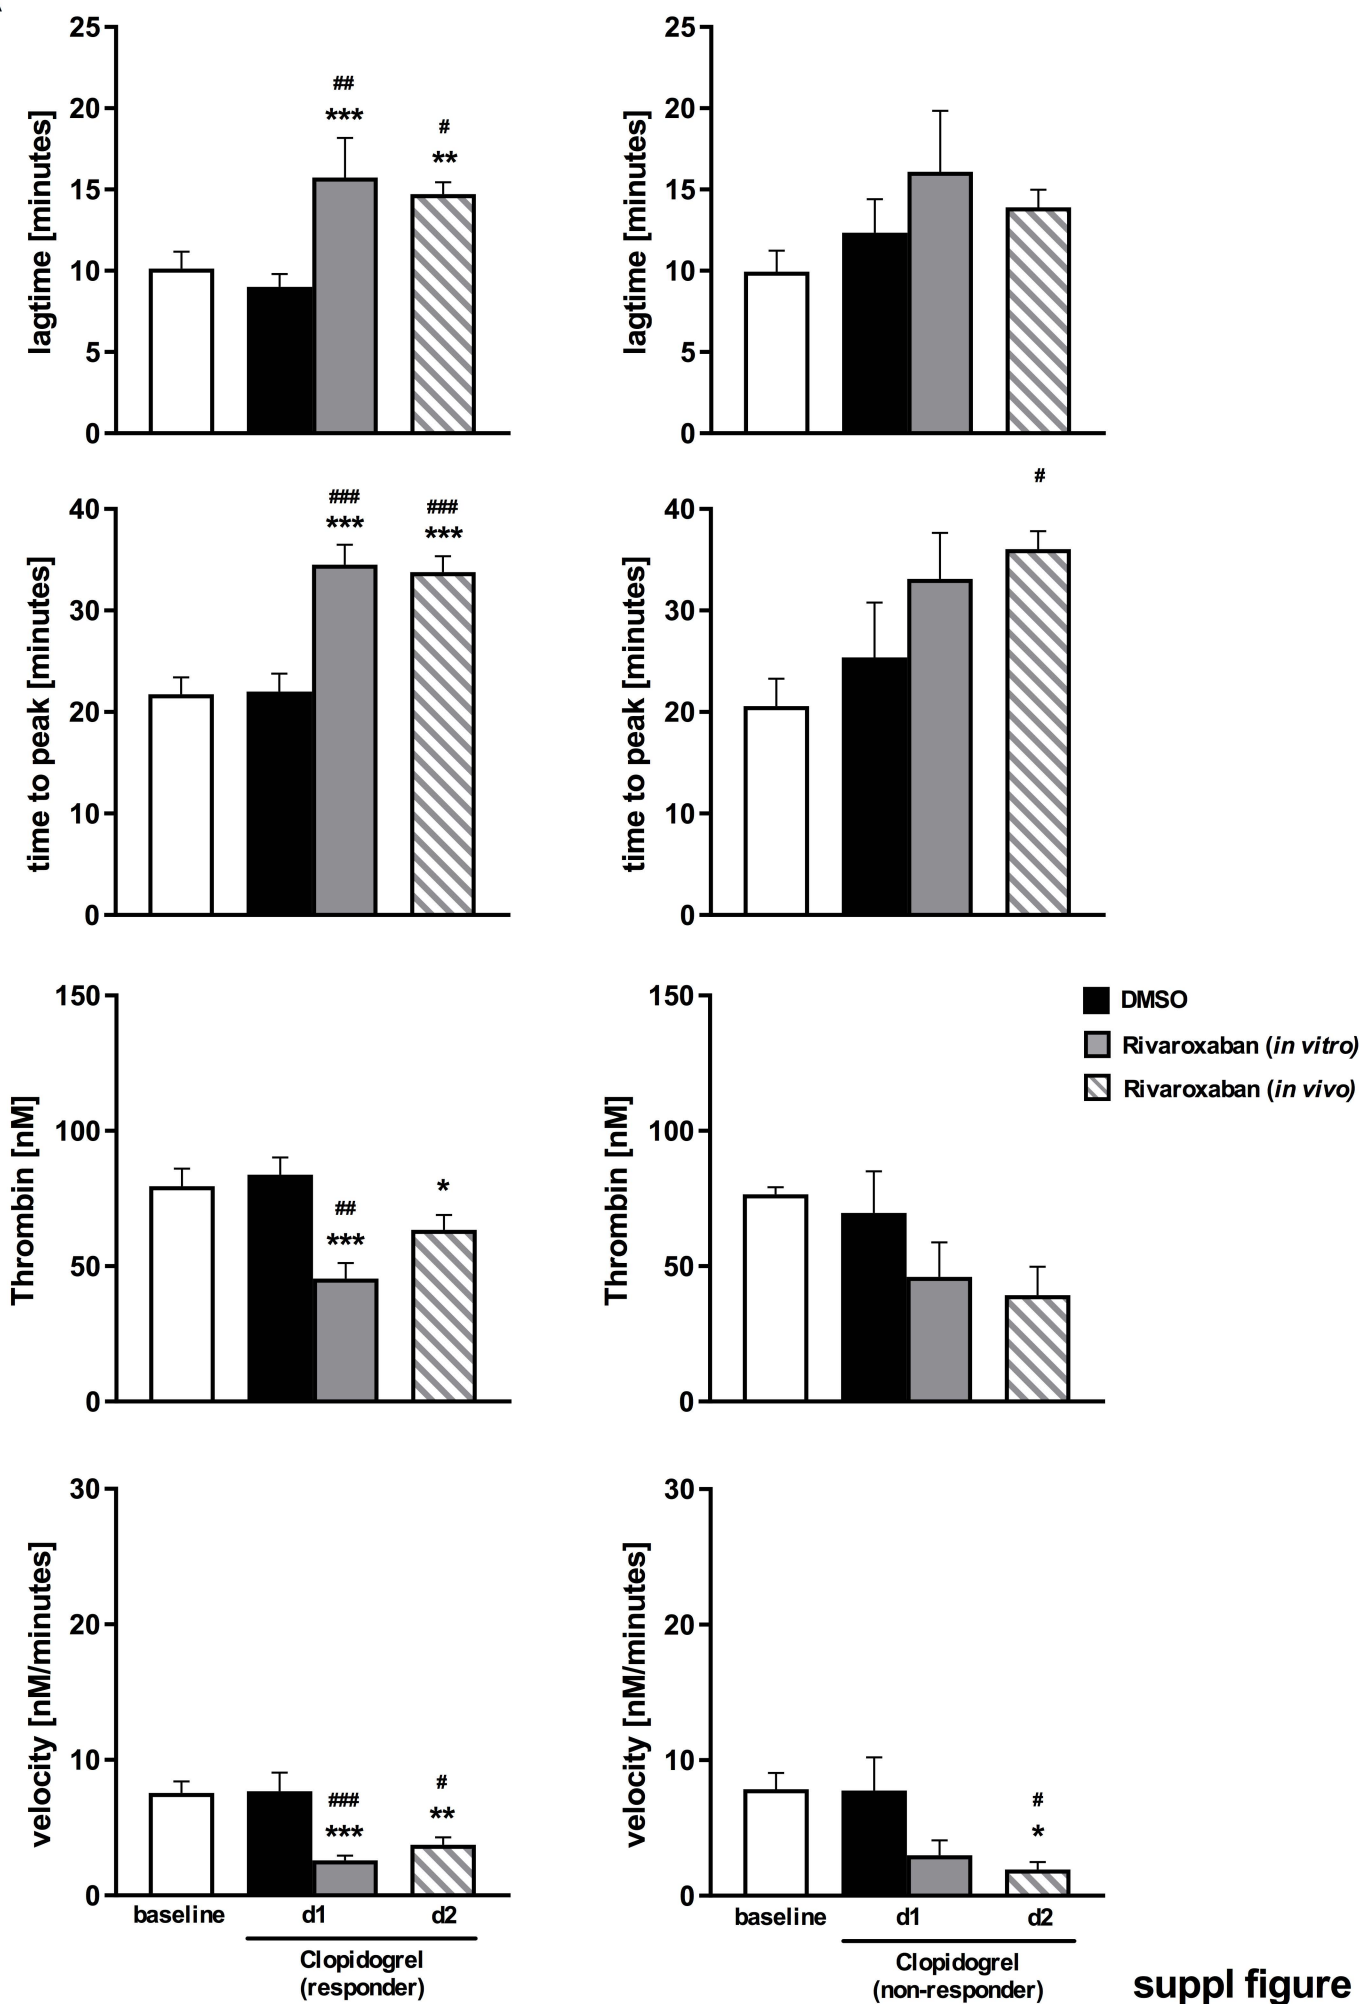

**B**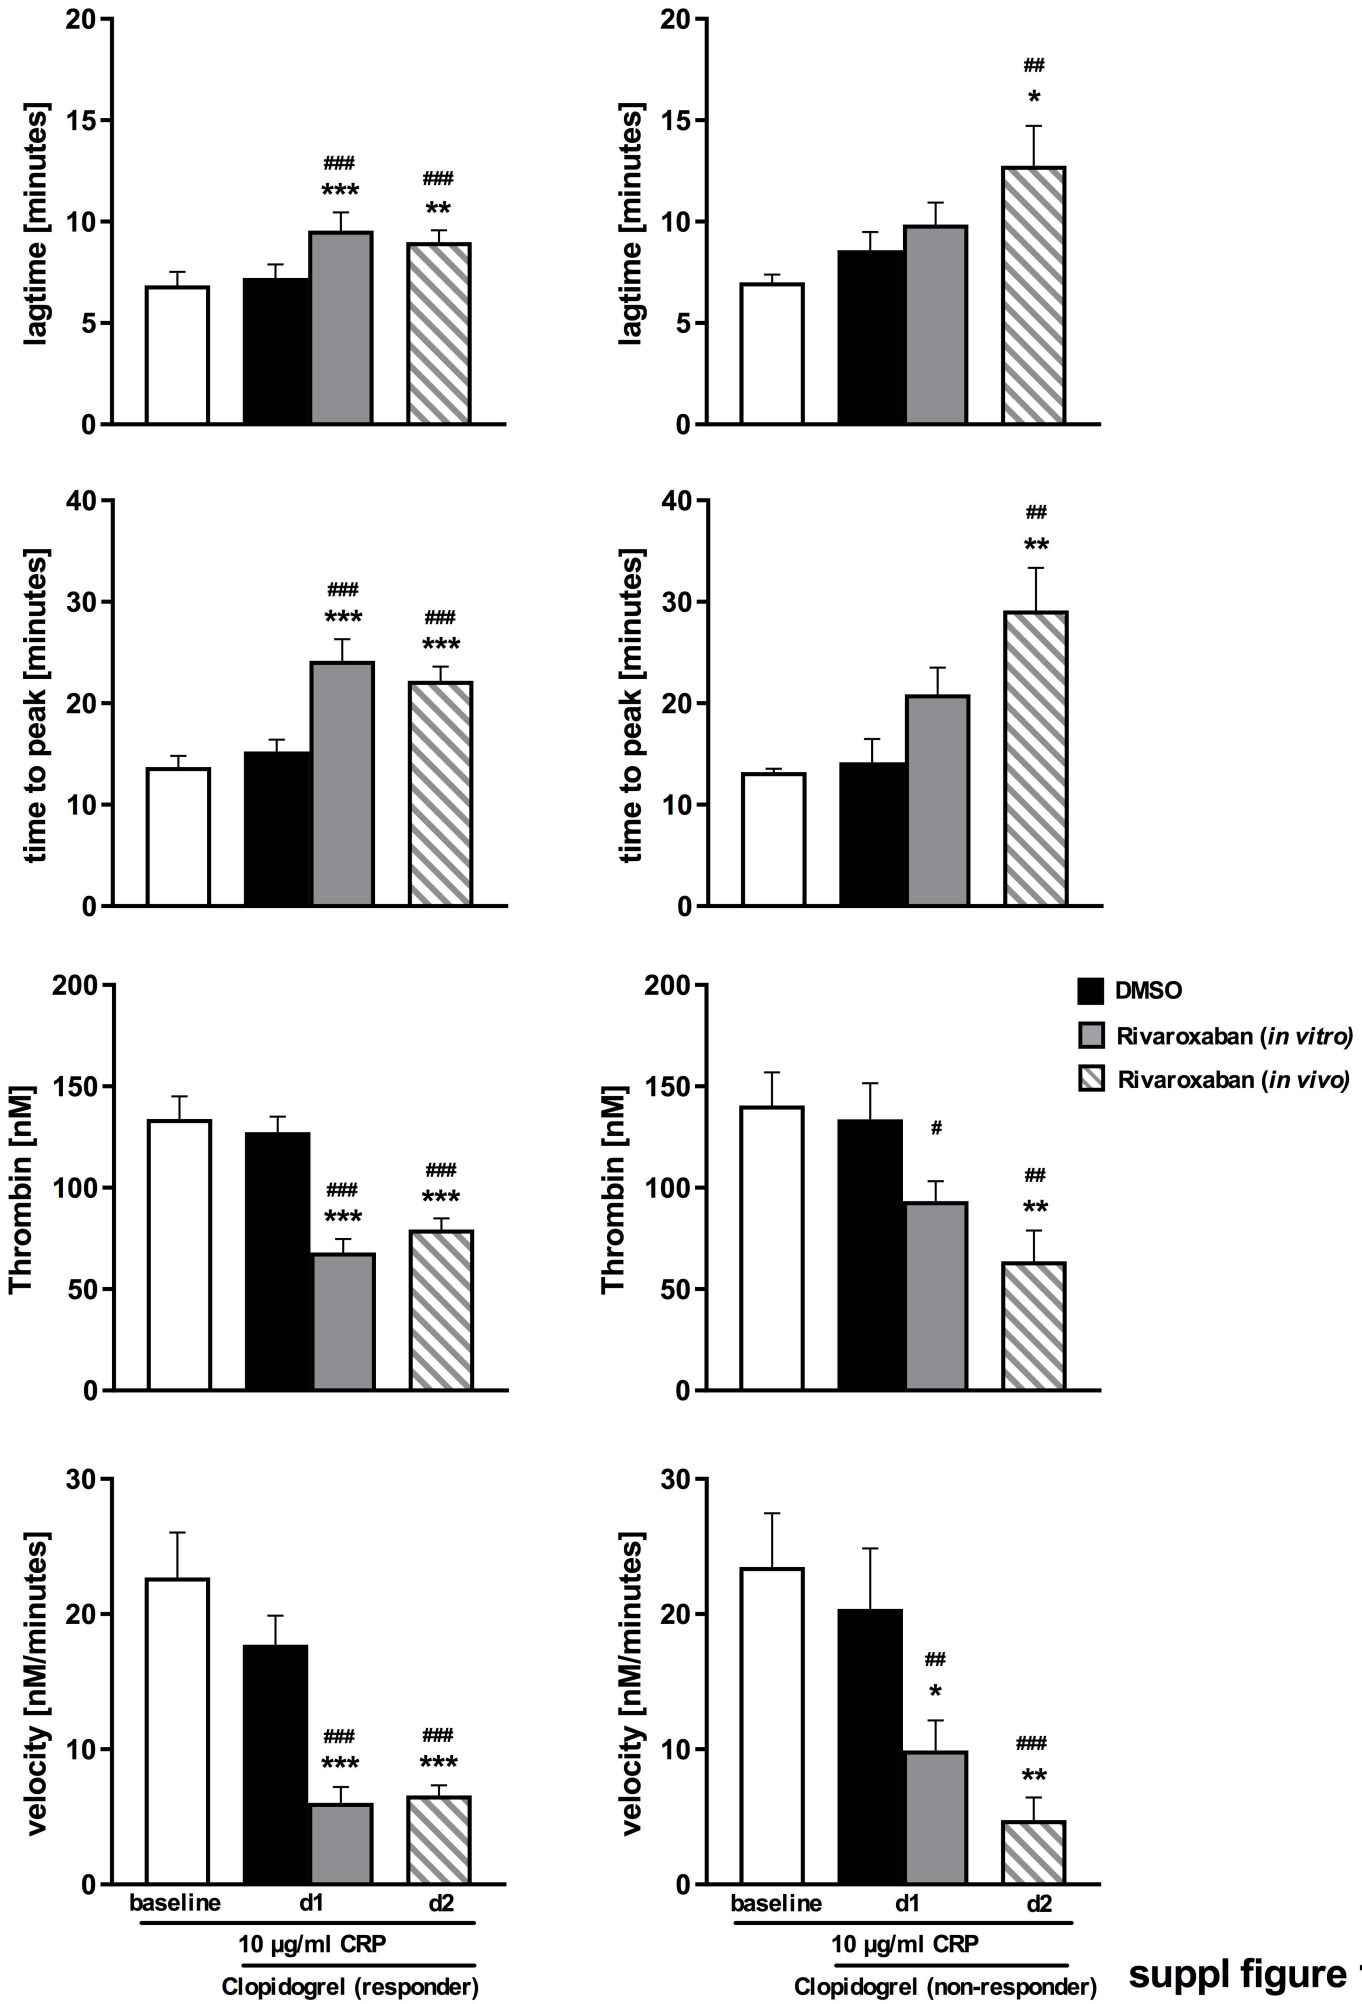**suppl figure 1**

**C**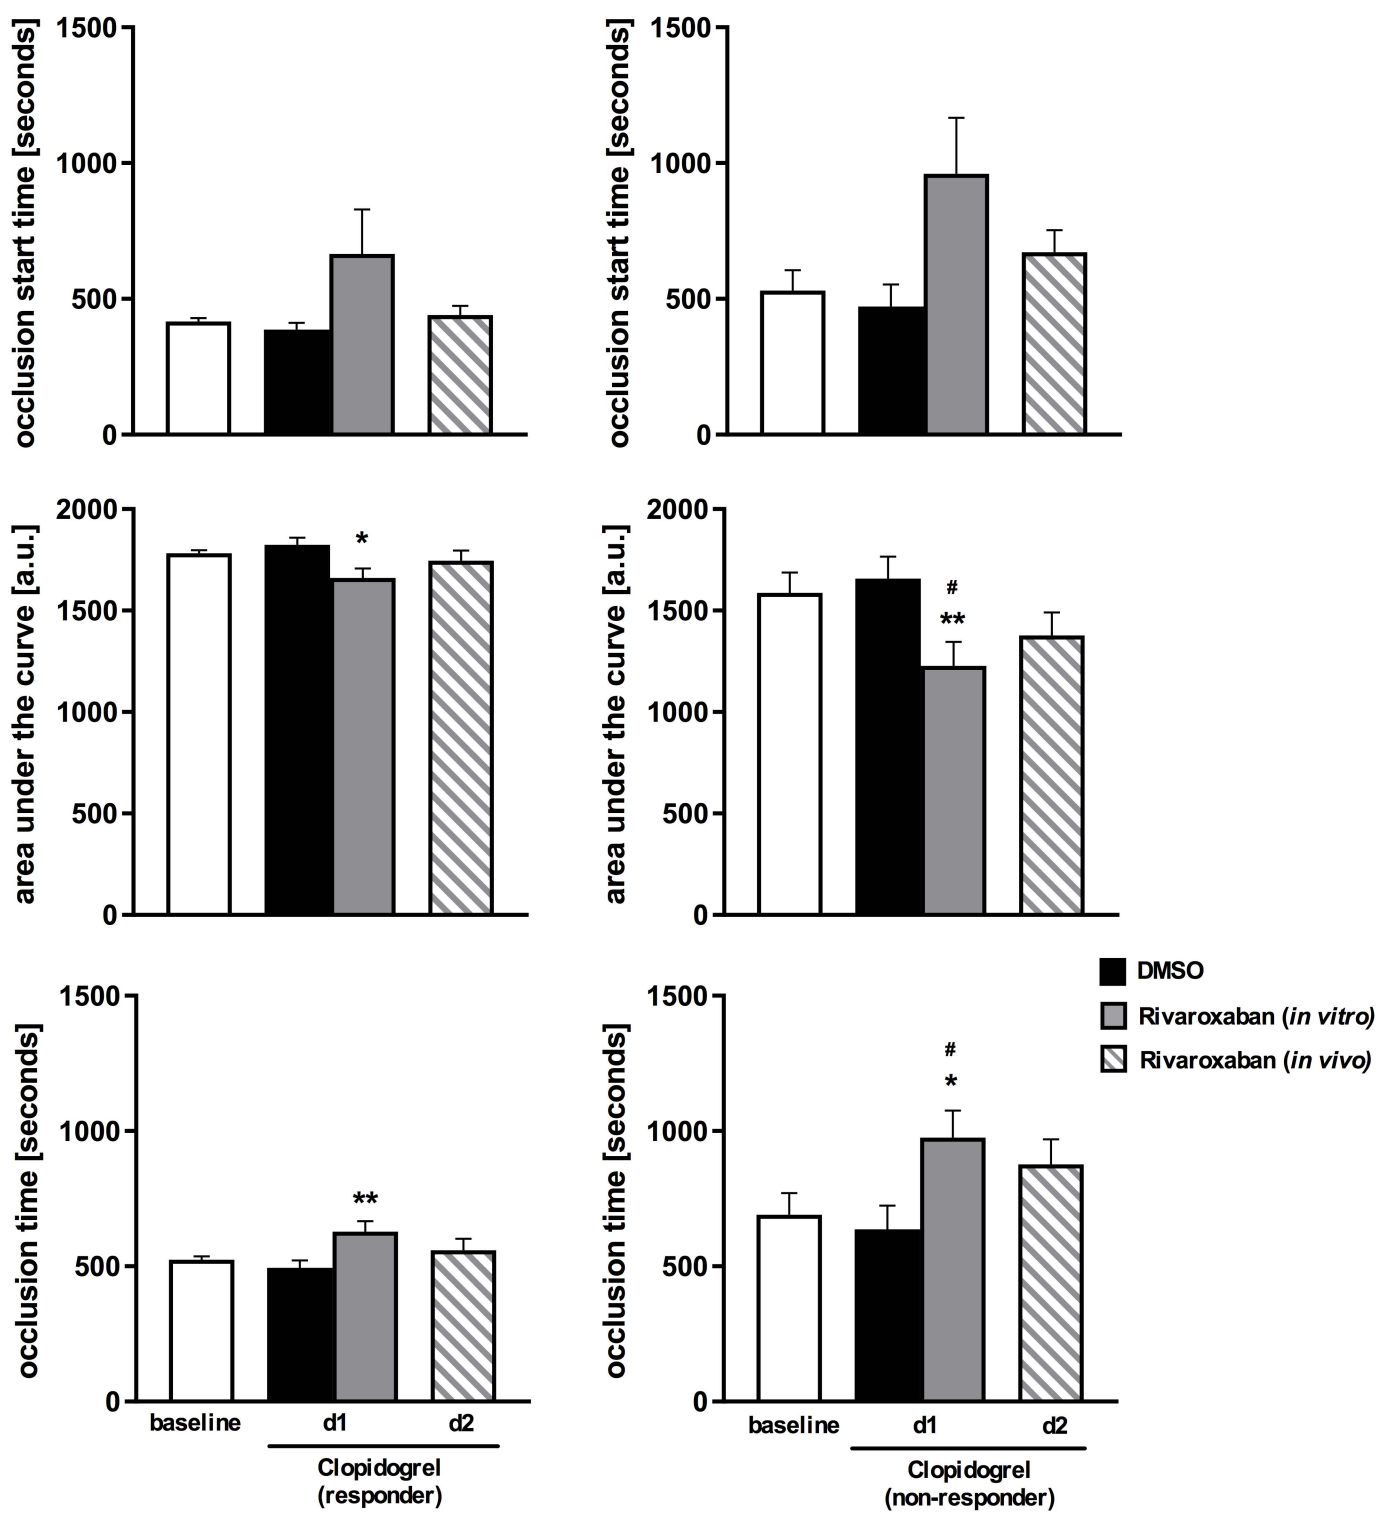

**A**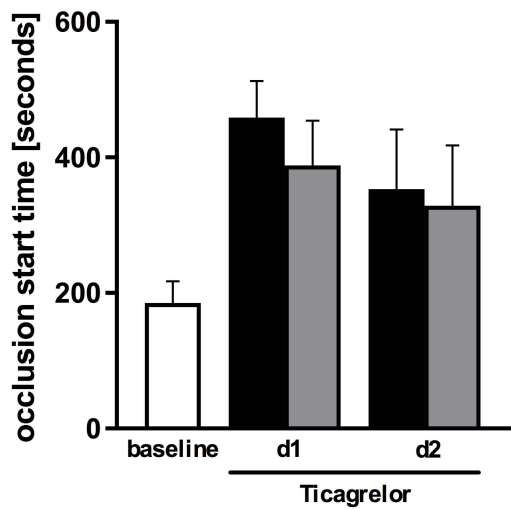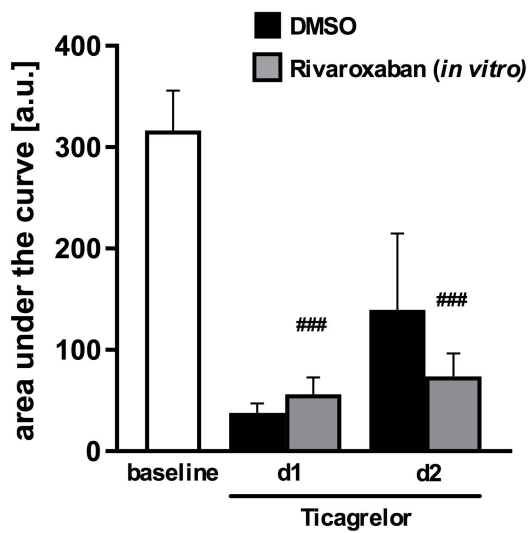**B**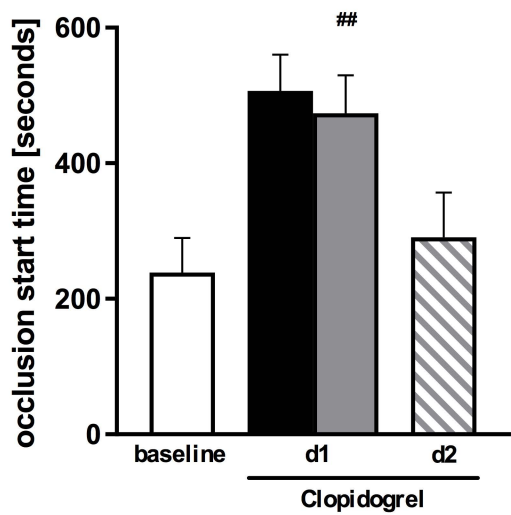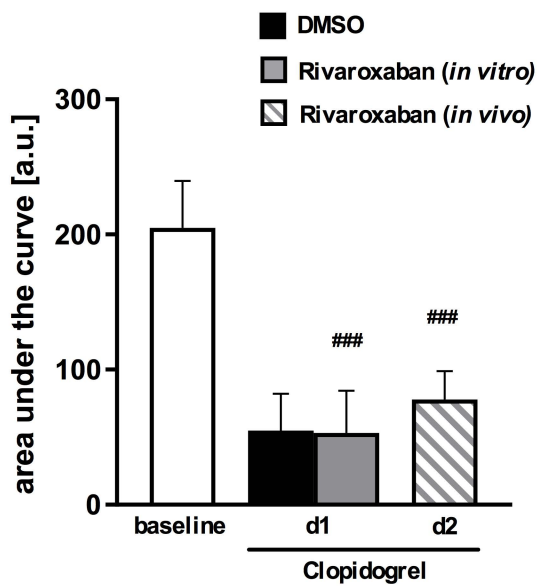

**A**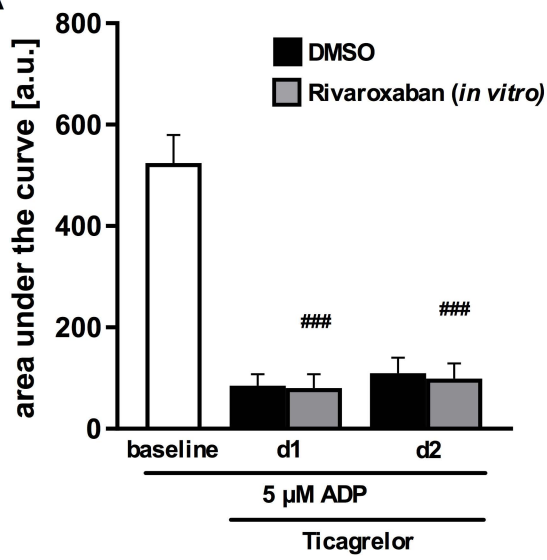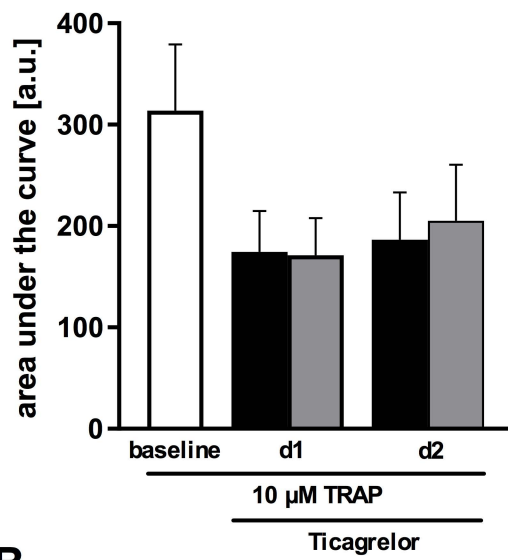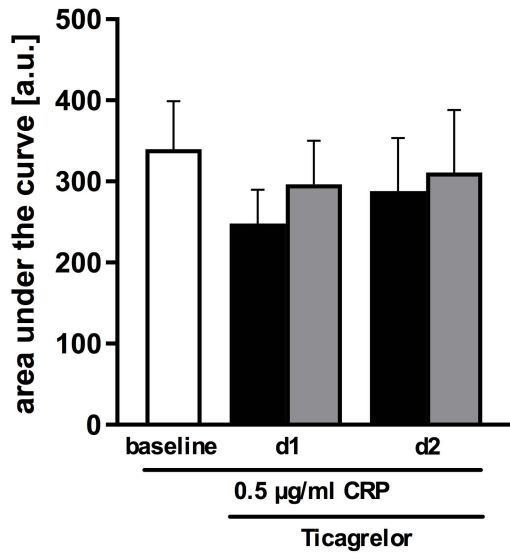**B**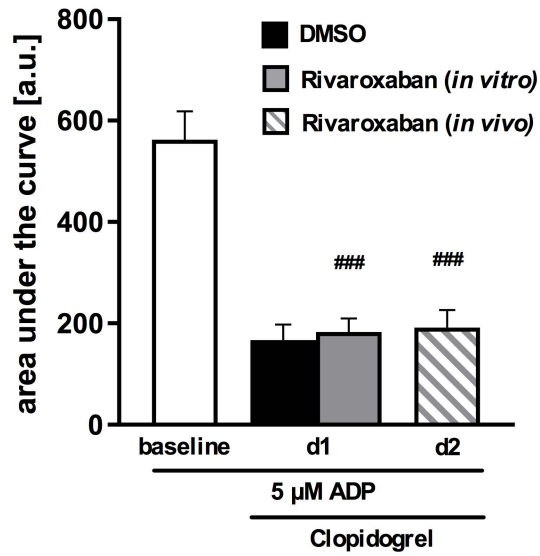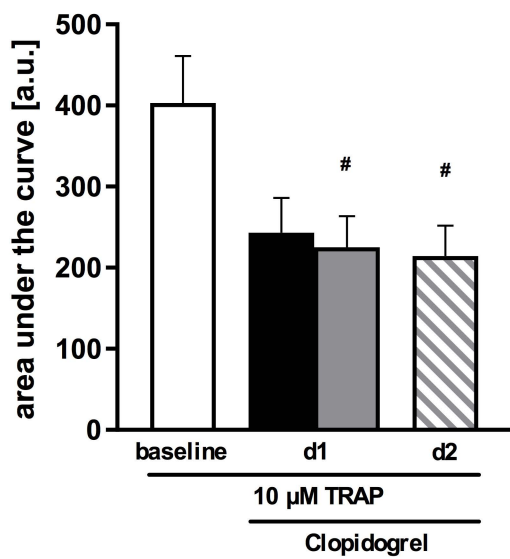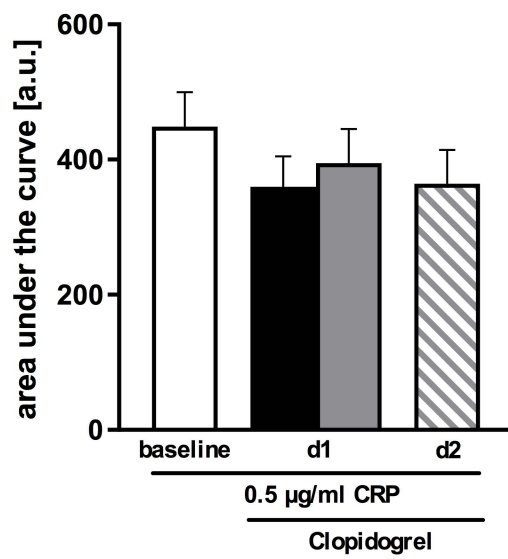

**A**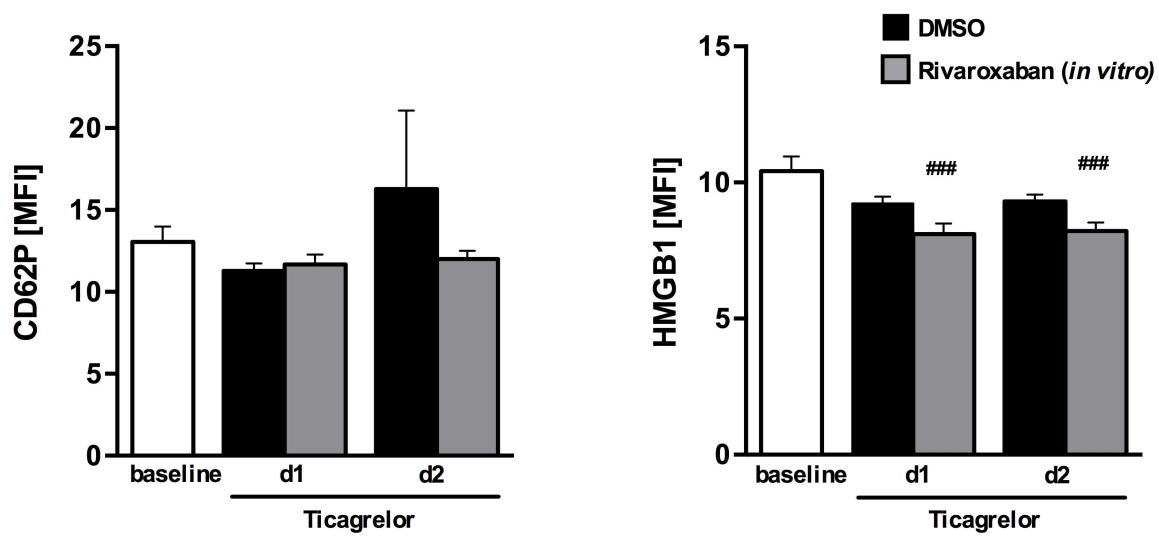**B**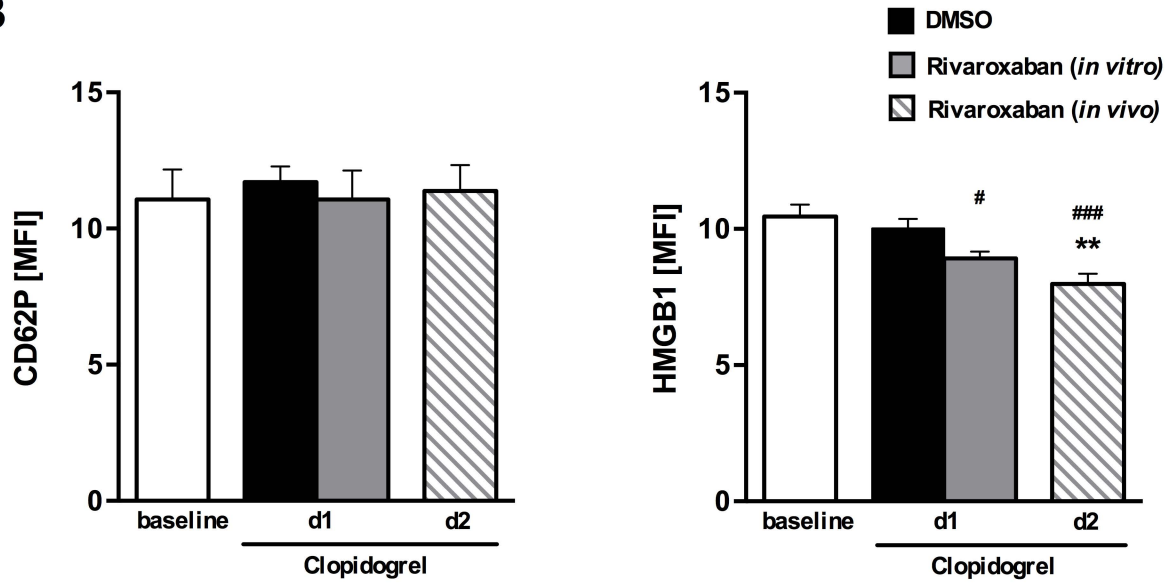

Supplement: ba013573-suppl1.pdf [file ba013573-suppl1.pdf]
